# Supplementary material
Source: publisher figshare collection journal article supplement (https://acs.figshare.com/ndownloader/files/19202837)
Supplement: Supplementary file 1 [file 19202837]

# Expression of Concern for “Determination of Ternary Vapor–Liquid Equilibrium of Dimethyl Oxalate–Methanol–1,2-Butanediol under Atmosphere Pressure”

Rongchun Shen, Yun Chen, Yunhai Shi, Jinghong Zhou, Xinggui Zhou, and Wei Li\*

*J. Chem. Eng. Data* 2019, 64 (4), 1349–1356, DOI: [10.1021/acs.jced.8b00918](https://doi.org/10.1021/acs.jced.8b00918)

As of July 2, 2019, the Editor issues an Expression of Concern to advise readers that an investigation is underway concerning the dimethyl oxalate + methanol binary data (Table S), 1,2-butanediol + methanol binary data (Table S), and dimethyl oxalate + methanol + 1,2-butanediol ternary data (Table 6), as well as the procedures used to test thermodynamic consistency in the article. The status of this article will be updated upon the completion of editorial review and the outcome of that investigation.
